# Supplementary material
Source: publisher figshare collection journal article supplement (https://geolsoc.figshare.com/ndownloader/files/5424002)
Supplement: Supplementary file 1 [file 5424002]

Instructions,,,,,
"Data Reduction: Through time, the fluence monitor ages and total 40K decay constants used to calculate Ar/Ar ages in published literature have changed frequently.  This spreadsheet re-reduces old data with a new fluence monitor age and decay constant.",,"Error Propagation: The new decay constant and fluence monitor age may have larger or smaller uncertainties than those originally used to reduce the data.  These errors, respectively, must be propagated to compare to data calculated with other fluence monitors and from other isotopic systems.",,,
Step 1:,"Find the decay constant and fluence monitor (standard) age used to calculate your legacy data.  These are usually in the methods section of the paper, or in a footnote of the data table.  Enter these into cells B3 and B4 of the ArArReCalc sheet.",Step 1:,Enter the new uncertainties in the decay constant and fluence monitor age you're converting to in cells C6 and C7.  The uncertainties in the previously used values are not needed.,,
Step 2:,"Input the new decay constant and fluence monitor age into cells B6 and B7.  If you'd like to propagate the uncertainty from the fluence monitor age and/or decay constant age, enter these into C6 and C7.",Step 2:,"Find the (internal) uncertainty in the sample age.  This is usually reported as  the combination of the uncertainty in the 40Ar/39Ar ratio of the sample, and that of the standard propagated into the J value.  Enter this into column F under legacy data age (1? internal).",,
Step 3:,Enter the Ar/Ar age that you'd like to convert (in Ma) into row B under the heading INPUT FOR EACH SAMPLE.  You may fill up to 50 rows with samples.  They will all use the same initial and final standard and decay constant values.,Step 3:,Find the J value used in the age calculation and its uncertainty.  This is usually included in the data table or supplementary material.  Enter these into columns G and H under J value and J 1?.,,
Result,"Automatically, the worksheet re-calculates a new age with the new decay constant and fluence monitor values, as well as the percent change.  As you enter new ages into column B, new converted ages will be calculated.",Result,"Three uncertainties are generated.  The analytical uncertainty will change by the same relative amount as the age.  The second uncertainty includes analytical uncertainty and the uncertainty in the fluence monitor age.  The third includes the analytical, standard age, and decay constant uncertainties.",,
,,,,,
,"To begin entering data, click the ArArReCalc worksheet tab at the bottom left of this Excel window.",,,,
,"Please contact Noah McLean at nmclean@mit.edu with questions, comments, and suggestions.",,,,
,,,,,
,,,,,
,,,,,
,,,,,
,,,,,
,,,,,
,,,,,
,,,,,
,,,,,
,,,,,
,,,,,
,,,,,
